# Supplementary material for: Salivary Gland Transcriptomes and Proteomes of Phlebotomus tobbi and Phlebotomus sergenti, Vectors of Leishmaniasis
Source: PLoS Negl Trop Dis. 2012 May 22;6(5):e1660. doi: 10.1371/journal.pntd.0001660 (PMC3358328; doi:10.1371/journal.pntd.0001660)
Supplement: Table S1 — List of sand fly salivary proteins with their identifiers and selected protein features. Published sand fly salivary proteins from Phlebotomus arabicus (Ara), P. argentipes (Arg), P. ariasi (Ari), P. duboscqi (Dub), P. papatasi (Pap), P. perniciosus (Per), P. sergenti (Ser), P. tobbi (Tob), and Lutzomyia longipalpis (Lon). The proteins are listed with their house name, GenBank accession numbers (Accn) for both nucleotide and protein sequences, protein name, presence in the proteome analysis as confirmed by mass spectrometry or Edman degradation, protein family, predicted signal peptide (SignalP), putative mature protein features (pI, predicted isoelectric point; Mw, predicted molecular weight; AA, number of amino acid residues), and reference. (XLS) [file pntd.0001660.s003.xls]

## Sheet: joint table (2)
reference	species	house name	nucleotide Accn	protein Accn	protein product name	Proteome	class	SignalP	pI	Mw	AA	domain	domain comment
Hostomska et al. 2009	Ara	PabSP93	FJ538113	ACS93526	14 kDa salivary protein C		PpSP15-like	20-21: CHA-DH	9.09	14.136	118	no
Hostomska et al. 2009	Ara	PabSP13	FJ538104	ACS93517	25 kDa salivary protein C	Yes	30 kDa antigen/Aegyptin	21-22: TEQ-DR	4.97	24.847	217	no
Hostomska et al. 2009	Ara	PabSP16	FJ538103	ACS93516	25 kDa salivary protein B	Yes	30 kDa antigen/Aegyptin	21-22: TEQ-DR	4.97	24.801	217	no
Hostomska et al. 2009	Ara	PabSP14	FJ538102	ACS93515	25 kDa salivary protein A	Yes	30 kDa antigen/Aegyptin	21-22: TEQ-DR	4.97	24.802	217	no
Hostomska et al. 2009	Ara	PabSP11	FJ538101	ACS93514	27 kDa salivary protein B	Yes	30 kDa antigen/Aegyptin	21-22: TEQ-DR	4.89	26.638	234	no
Hostomska et al. 2009	Ara	PabSP15	FJ538100	ACS93513	27 kDa salivary protein	Yes	30 kDa antigen/Aegyptin	21-22: TEQ-DR	4.92	29.31	259	no
Hostomska et al. 2009	Ara	PabSP56	FJ538099	ACS93512	2.7 kDa salivary peptide			23-24: SEA-AP
Hostomska et al. 2009	Ara	PabSP126	EZ000636	ACS93500	17 kDa salivary protein			22-23: LEA-NE
Hostomska et al. 2009	Ara	PabSP107	EZ000635	ACS93499	22 kDa salivary protein			20-21: VTA-LP
	Ara		EZ000634	ACS93498	truncated salivary pyrophosphatase-like protein		pyrophosphatase	no
	Ara		EZ000626	ACS93490	putative truncated salivary amylase		amylase	no
Hostomska et al. 2009	Ara	PabSP45	FJ538112	ACS93525	14 kDa salivary protein B	Yes	PpSP15-like	19-20: CHA-ER	9.23	14.21	118	no
	Ara		EZ000625	ACS93489	putative truncated salivary trehalase		trehalase	no
Hostomska et al. 2009	Ara	PabSP34	FJ489242	ACS93511	34 kDa salivary protein B	Yes	33 kDa	21-22: TIC-MK	8.71	34.057	290	no
Hostomska et al. 2009	Ara	PabSP32	FJ489241	ACS93510	34 kDa salivary protein A	Yes	33 kDa	21-22: TIC-MK	8.72	34.036	290	no
Hostomska et al. 2009	Ara	PabSP97	FJ474088	ACS93509	10 kDa salivary protein			20-21: VTC-II
Hostomska et al. 2009	Ara	PabSP75	FJ474087	ACS93508	10 kDa salivary protein			21-22: AFA-ES	4.42	10.323	97	no
Hostomska et al. 2009	Ara	PabSP64	FJ474086	ACS93507	16 kDa salivary protein B			21-22: SNA-LP	5.12	15.994	138	no
Hostomska et al. 2009	Ara	PabSP63	FJ474085	ACS93506	16 kDa salivary protein A			21-22: SNA-LP	5.36	15.943	138	no
Hostomska et al. 2009	Ara	PabSP72	FJ439533	ACS93505	salivary hyaluronidase		hyaze	19-20: SFA-AD	8.95	52.992	455	Glyco_hydro_56	full
Hostomska et al. 2009	Ara	PabSP49	FJ439531	ACS93503	putative salivary endonuclease	Yes	endonuclease	23-24: SQS-AP
Hostomska et al. 2009	Ara	PabSP26	FJ410293	ACS93501	yellow-related salivary protein	Yes	yellow-related	18-19: AFA-YH	8.28	42.86	375	MRJP	full
Hostomska et al. 2009	Ara	PabSP2	FJ538111	ACS93524	14 kDa salivary protein A	Yes	PpSP15-like	20-21: CHS-ER	8.92	14.187	118	no
Hostomska et al. 2009	Ara	PabSP39	EZ000633	ACS93497	salivary apyrase A	Yes	apyrase	20-21: TKA-AP	8.85	35.3012	313	apyrase	full
Hostomska et al. 2009	Ara	PabSP40	EZ000632	ACS93496	salivary apyrase B	Yes	apyrase	20-21: TKA-AP	8.71	35.3111	313	apyrase	full
Hostomska et al. 2009	Ara	PabSP41	EZ000631	ACS93495	salivary apyrase C	Yes	apyrase	20-21: TKA-AP	8.85	35.2792	313	apyrase	full
Hostomska et al. 2009	Ara	PabSP29	EZ000630	ACS93494	28 kDa salivary protein		PpSP32-like	18-19: AQC-AP	10.55	27.759	260	no
Hostomska et al. 2009	Ara	PabSP30	EZ000629	ACS93493	26 kDa salivary protein	Yes	PpSP32-like	18-19: AQC-AP	10.34	26.327	245	no
Hostomska et al. 2009	Ara	PabSP31	EZ000628	ACS93492	25 kDa salivary protein	Yes	PpSP32-like	18-19: AQC-AP	10.3	24.982	230	no
Hostomska et al. 2009	Ara	PabSP52	EZ000627	ACS93491	putative salivary phospholipase A2		phospholipase A2	29-30: ARA-KP
Hostomska et al. 2009	Ara	PabSP4	FJ439532	ACS93504	antigen 5-related protein	Yes	Ag5-related	18-19: VHS-ND	9.02	28.9	252	SCP_euk	full
	Ara		FJ427208	ACS93502	translocon-associated protein complex delta subunit		translocon	20-21: ASS-ET
Hostomska et al. 2009	Ara	PabSP84	FJ538110	ACS93523	D7-related salivary protein D		D7-related	19-20: VYS-FK	9.25	28.128	240	no
Hostomska et al. 2009	Ara	PabSP54	FJ538109	ACS93522	D7-related salivary protein C	Yes	D7-related	19-20: GYA-WQ	8.93	26.691	232	PBP-G0BP	3´truncated
Hostomska et al. 2009	Ara	PabSP59	FJ538108	ACS93521	D7-related salivary protein B		D7-related	19-20: ANC-LQ	9.35	27.346	232	no
Hostomska et al. 2009	Ara	PabSP20	FJ538107	ACS93520	D7-related salivary protein A	Yes	D7-related	19-20: GYS-WQ	9.08	26.924	236	no
Hostomska et al. 2009	Ara	PabSP53	FJ538106	ACS93519	46 kDa salivary protein		41.9 kDa	20-21: VSS-VF	6.02	46.356	422	no
Hostomska et al. 2009	Ara	PabSP12	FJ538105	ACS93518	25 kDa salivary protein D	Yes	30 kDa antigen/Aegyptin	21-22: TEQ-DR	4.97	24.82	217	no
Anderson et al. 2006	Arg	PagSP11	DQ136157	ABA12142	40 kDa salivary protein SP11		endonuclease	21-22: SAA-KS
Anderson et al. 2006	Arg	PagSP02	DQ136149	ABA12134	13.6 kDa salivary protein SP02	Yes	PpSP15-like	20-21: SYG-AT	9.33	13.625	119	no
Anderson et al. 2006	Arg	PagSP01	DQ136148	ABA12133	14.2 kDa salivary protein SP01	Yes	PpSP15-like	20-21: SNA-SS	6.33	14.302	123	no
Anderson et al. 2006	Arg	PagSP124	DQ136169	ABA12154	15.5 kDa salivary protein SP124			21-22: TRS-QP
Anderson et al. 2006	Arg	PagSP73	DQ136168	ABA12153	16 kDa salivary protein SP73			20-21: AEG-AP	5.44	16.131	142	no
Anderson et al. 2006	Arg	PagSP60	DQ136167	ABA12152	12 kDa salivary protein SP60			19-20: SEA-IF
Anderson et al. 2006	Arg	PagSP56	DQ136166	ABA12151	30 kDa salivary protein SP56			20-21: VMG-GL
Anderson et al. 2006	Arg	PagSP25	DQ136165	ABA12150	28 kDa salivary D7-related protein SP25		D7-related	20-21: AHS-LQ	9.41	27.951	234	no
Anderson et al. 2006	Arg	PagSP20	DQ136164	ABA12149	27 kDa salivary protein SP20			20-21: VLG-NI
Anderson et al. 2006	Arg	PagSP19	DQ136163	ABA12148	30 kDa salivary protein SP19			21-22: SEQ-AP
Anderson et al. 2006	Arg	PagSP17	DQ136162	ABA12147	29 kDa salivary protein SP17	Yes		20-21: AES-IH
Anderson et al. 2006	Arg	PagSP04	DQ136151	ABA12136	43 kDa salivary yellow-related protein SP04	Yes	yellow-related	18-19: ILG-YH	8.67	43.33	380	MRJP	full
Anderson et al. 2006	Arg	PagSP15	DQ136161	ABA12146	30 kDa salivary protein SP15			20-21: VLG-SI
Anderson et al. 2006	Arg	PagSP14	DQ136160	ABA12145	44 kDa salivary lipase-like protein SP14		lipase	24-25: SLA-SE
Anderson et al. 2006	Arg	PagSP10	DQ136156	ABA12141	27 kDa salivary D7-related protein SP10	Yes	D7-related	19-20: GFS-WQ	5.49	26.863	234	no
Anderson et al. 2006	Arg	PagSP132	DQ136170	ABA12155	47 kDa salivary pyrophosphatase-like protein SP132		pyrophosphatase	22-23: SAA-RN
Anderson et al. 2006	Arg	PagSP03	DQ136150	ABA12135	35 kDa putative salivary apyrase SP03	Yes	apyrase	21-22: IEA-AP	9.08	34.9998	310	apyrase	full
Anderson et al. 2006	Arg	PagSP13	DQ136159	ABA12144	14 kDa salivary protein SP13		PpSP15-like	20-21: CQA-EN	8.58	14.096	116	no
Anderson et al. 2006	Arg	PagSP12	DQ136158	ABA12143	14 kDa salivary protein SP12		PpSP15-like	20-21: IYA-LD	8.62	14.143	120	no
Anderson et al. 2006	Arg	PagSP09	DQ136155	ABA12140	33 kDa salivary protein SP05	Yes	33 kDa	21-22: VAC-MK	8.91	33.386	287	no
Anderson et al. 2006	Arg	PagSP07	DQ136154	ABA12139	14.2 kDa salivary protein SP07	Yes	PpSP15-like	20-21: CGA-ER
Anderson et al. 2006	Arg	PagSP06	DQ136153	ABA12138	25 kDA salivary protein SP06	Yes	PpSP32-like	17-18: VQC-AR	9.66	24.983	222	no
Anderson et al. 2006	Arg	PagSP05	DQ136152	ABA12137	29 kDa salivary antigen 5-related protein SP05	Yes	Ag5-related	19-20: VHT-QT	8.92	29.205	255	SCP_euk	full
Oliveira et al. 2006	Ari	ParSP06	AY861654	AAX55748	14 kDa salivary protein	Yes	PpSP15-like	19-20: CHA-ER	9.44	14.256	118	no
Oliveira et al. 2006	Ari	ParSP08	AY861656	AAX55750	14 kDa salivary protein	Yes	PpSP15-like	20-21: CQA-EH	8.8	14.088	119	no
Oliveira et al. 2006	Ari	ParSP07	AY861655	AAX55749	27 kDa salivary protein		D7-related	19-20: ANS-LQ	9.44	26.906	231	no
Oliveira et al. 2006	Ari	ParSP46	AY862998	AAX55667	48 kDa salivary protein		enterokinase	20-21: QVA-QN
Oliveira et al. 2006	Ari	ParSP43	AY862997	AAX55666	11 kDa salivary protein			24-25: AYS-AA
Oliveira et al. 2006	Ari	ParSP31	AY862996	AAX55665	24 kDa salivary protein			17-18: VVA-EG
Oliveira et al. 2006	Ari	ParSP25	AY862995	AAX55664	27 kDa salivary protein		30 kDa antigen/Aegyptin	21-22: TEQ-DR	4.93	26.578	228	no
Oliveira et al. 2006	Ari	ParSP23	AY862994	AAX55663	2 kDa salivary protein			24-25: SQA-NP	9.19	2.383	21	no
Oliveira et al. 2006	Ari	ParSP21	AY862993	AAX55662	10 kDa salivary protein			20-21: VTC-LM
Oliveira et al. 2006	Ari	ParSP17	AY862992	AAX55661	39 kDa salivary protein		41.9 kDa	no	7.56	41.811	375	HSH155	3´truncated
Oliveira et al. 2006	Ari	ParSP16	AY862991	AAX55660	27 kDa salivary protein	Yes	D7-related	19-20: GYS-WK	7.5	26.74	232	PBP-G0BP	3´truncated
Oliveira et al. 2006	Ari	ParSP80	AY862999	AAX55668	16 kDa salivary protein			20-21: VSS-ET
Oliveira et al. 2006	Ari	ParSP15	AY862485	AAX55658	5 kDa salivary protein			20-21: AEA-IP	11.47	4.902	45	no
Oliveira et al. 2006	Ari	ParSP13	AY862484	AAX55657	12 kDa salivary protein			21-22: AFA-ES	4.88	12.296	116	no
Oliveira et al. 2006	Ari	ParSP11	AY861671	AAX54852	30 kDa salivary protein	Yes	phospholipase A2	29-30: ARA-KP
Oliveira et al. 2006	Ari	ParSP05	AY850691	AAX44092	salivary protein	Yes	Ag5-related	19-20: AHS-ND	9.13	29.637	258	SCP_euk	full
Oliveira et al. 2006	Ari	ParSP04b	AY850692	AAX44093	salivary protein	Yes	yellow-related	18-19: ALA-YH	8.28	42.89	375	MRJP	full
Oliveira et al. 2006	Ari	ParSP03	AY845195	AAX56359	14 kDa salivary protein	Yes	PpSP15-like	20-21: CRS-ER	8.63	14.301	118	no
Oliveira et al. 2006	Ari	ParSP12	AY861672	AAX54853	27 kDa salivary protein	Yes	D7-related	18-19: GYS-WK	9	26.496	234	PBP-G0BP	3´truncated
Oliveira et al. 2006	Ari	ParSP04	AY845196	AAX56360	42 kDa salivary protein	Yes	yellow-related	18-19: ALA-SQ	5.78	41.67	370	MRJP	full
Oliveira et al. 2006	Ari	ParSP02	AY845194	AAX56358	30.5 kDa salivary protein	Yes	PpSP32-like	17-18: AQC-AP	10.25	30.455	275	no
Oliveira et al. 2006	Ari	ParSP01	AY845193	AAX56357	35.5 kDa salivary protein	Yes	apyrase	20-21: GEA-AP	8.52	35.4811	313	apyrase	full
Oliveira et al. 2006	Ari	ParSP10	AY861658	AAX55752	41 kDa salivary protein		endonuclease	23-24: CKS-AP
Oliveira et al. 2006	Ari	ParSP09	AY861657	AAX55751	34 kDa salivary protein		33 kDa	22-23: TIS-MK	9.03	34.294	290	no
Kato et al. 2006	Dub	PduK56	DQ835369	ABI20174	14.2 kDa salivary protein		PpSP15-like	20-21: CQA-GI	8.41	14.148	121	no
Kato et al. 2006	Dub	PduK83	DQ835382	ABI20187	31 kDa salivary protein		PpSP32-like	24-25: SSG-KP	9.45	30.499	278	no
Kato et al. 2006	Dub	PduK77	DQ835380	ABI20185	2.5 kDa salivary protein			27-28: AKA-QN
Kato et al. 2006	Dub	PduK45	DQ835379	ABI20184	32.8 kDa salivary protein		PpSP32-like	17-18: AHC-AQ	9.42	33.63	308	no
Kato et al. 2006	Dub	PduK41	DQ835378	ABI20183	14.1 kDa salivary protein		PpSP15-like	20-21: CQA-AI	8.6	14.133	121	no
Kato et al. 2006	Dub	PduK02	DQ835377	ABI20182	14.5 kDa salivary protein		PpSP15-like	20-21: CQA-EN	9.19	14.457	122	no
Kato et al. 2006	Dub	PduK68	DQ835375	ABI20180	29 kDa salivary protein		Ag5-related	19-20: VQS-QT	9.06	28.779	252	SCP_euk	full
Kato et al. 2006	Dub	PduK42	DQ835374	ABI20179	14.4 kDa salivary protein		PpSP15-like	20-21: CQA-DI
Kato et al. 2006	Dub	PduK58	DQ835373	ABI20178	14.9 kDa salivary protein		PpSP15-like	15-16: LYA-EI	7.71	15.504	130	no
Kato et al. 2006	Dub	PduK03	DQ835372	ABI20177	14.5 kDa salivary protein		PpSP15-like	20-21: CQA-ET	9.04	14.505	122	no
Kato et al. 2006	Dub	PduK46	DQ835371	ABI20176	34.5 kDa salivary protein		PpSP32-like	23-24: TSS-AN	9.48	34.538	316	no
Kato et al. 2006	Dub	PduM60	DQ834336	ABI20152	14.4 kDa salivary protein		PpSP15-like	15-16: LYA-EI	8.24	15.56	130	no
Kato et al. 2006	Dub	PduK57	DQ835370	ABI20175	13.7 kDa salivary protein	Yes	PpSP15-like	20-21: CQA-AT	9.23	13.654	120	no
Kato et al. 2006	Dub	PduK49	DQ835368	ABI20173	14.4 kDa salivary protein		PpSP15-like	20-21: AFG-FG	8.23	14.579	122	no
Kato et al. 2006	Dub	PduK01	DQ835362	ABI20167	14.4 kDa salivary protein	Yes	PpSP15-like	20-21: CQA-ET	9.05	14.406	122	no
Kato et al. 2006	Dub	PduM87	DQ835361	ABI20166	28 kDa salivary protein		PpSP32-like	19-20: CVA-LP	9.56	34.891	322	no
Kato et al. 2006	Dub	PduM99	DQ835359	ABI20164	13.9 kDa salivary protein		PpSP15-like	20-21: CDA-AH	8.89	13.91	118	no
Kato et al. 2006	Dub	PduM89	DQ835358	ABI20163	14.5 kDa salivary protein			18-19: VLT-AP
Kato et al. 2006	Dub	PduM72	DQ835356	ABI20161	31 kDa salivary protein		PpSP32-like	17-18: AHC-AQ	9.57	33.398	303	SOG2	3´5´truncated
Kato et al. 2006	Dub	PduM80	DQ835355	ABI20160	2.8 kDa salivary protein			28-29: AKA-QN
Kato et al. 2006	Dub	PduM78	DQ834343	ABI20159	16 kDa salivary protein			16-17: TKA-SL
Kato et al. 2006	Dub	PduM77	DQ834342	ABI20158	27 kDa salivary protein		D7-related	19-20: GYS-WQ	8.85	26.86	235	no
Kato et al. 2006	Dub	PduM38	DQ834335	ABI20151	35.8 kDa salivary protein	Yes	apyrase	21-22: SEG-AP	9	35.8291	315	apyrase	full
Kato et al. 2006	Dub	PduM47	DQ834341	ABI20157	27.6 kDa salivary protein		D7-related	19-20: GYS-WQ	8.75	27.6	234	no
Kato et al. 2006	Dub	PduM32	DQ834340	ABI20156	14 kDa salivary protein	Yes	PpSP15-like	20-21: CQA-GI	8.58	14.148	121	no
Kato et al. 2006	Dub	PduM04	DQ834339	ABI20155	34 kDa salivary protein		33 kDa	19-20: VLG-LG	8.48	34.474	294	no
Kato et al. 2006	Dub	PduM54	DQ834338	ABI20154	46 kDa salivary protein			21-22: ITG-CQ
Kato et al. 2006	Dub	PduM62	DQ834337	ABI20153	14.2 kDa salivary protein		PpSP15-like	20-21: CQA-EI	7.6	14.233	121	no
Kato et al. 2006	Dub	PduM58	DQ834334	ABI20150	13.7 kDa salivary protein		PpSP15-like	20-21: CQA-AT	9.35	13.698	120	no
Kato et al. 2006	Dub	PduM50	DQ834332	ABI20148	14.6 kDa salivary protein		PpSP15-like	20-21: AFG-FG	8.23	14.579	122	no
Kato et al. 2006	Dub	PduM33	DQ834330	ABI20146	31.4 kDa salivary protein		PpSP32-like	24-25: SSG-KP	9.54	30.978	283	no
Kato et al. 2006	Dub	PduM49	DQ826526	ABI15945	14.2 kDa salivary protein		PpSP15-like	20-21: CQA-AI	8.42	14.206	121	no
Kato et al. 2006	Dub	PduM48	DQ826525	ABI15944	28.8 kDa salivary protein		Ag5-related	19-20: VQS-QT	8.99	28.765	252	SCP_euk	full
Kato et al. 2006	Dub	PduM57	DQ834333	ABI20149	14.6 kDa salivary protein		PpSP15-like	20-21: AFG-FG	8.8	14.632	125	no
Kato et al. 2006	Dub	PduM03	DQ826524	ABI15943	14.5 kDa salivary protein		PpSP15-like	20-21: CQA-ET	9.04	14.505	122	no
Kato et al. 2006	Dub	PduM46	DQ826523	ABI15942	27.6 kDa salivary protein	Yes	D7-related	19-20: GYS-WQ	8.84	27.638	234	PBP-G0BP	3´truncated
Kato et al. 2006	Dub	PduM35	DQ826522	ABI15941	42.6 kDa salivary protein	Yes	yellow-related	18-19: ALS-DD	9.29	42.6	377	MRJP	full
Kato et al. 2006	Dub	PduM31	DQ826520	ABI15939	14.2 kDa salivary protein	Yes	PpSP15-like	20-21: CQA-GI	8.41	14.148	121	no
Kato et al. 2006	Dub	PduM10	DQ826519	ABI15938	43.3 kDa salivary protein	Yes	yellow-related	18-19: VFC-DD	7.74	43.36	381	MRJP	full
Kato et al. 2006	Dub	PduM07	DQ826518	ABI15937	14 kDa salivary protein	Yes	PpSP15-like	20-21: CQA-AN	8.81	13.974	120	no
Kato et al. 2006	Dub	PduM01	DQ826517	ABI15936	26.7 kDa salivary protein	Yes	D7-related	19-20: GYS-WR	7.79	26.66	230	PBP-G0BP	3´truncated
Kato et al. 2006	Dub	PduM06	DQ826516	ABI15935	14.4 kDa salivary protein	Yes	PpSP15-like	20-21: CQA-ET	9.05	14.406	122	no
Kato et al. 2006	Dub	PduM29	DQ826515	ABI15934	26.3 kDa salivary protein	Yes	D7-related	28-29: GYS-WK	8.52	26.282	229	no
Kato et al. 2006	Dub	PduM02	DQ826514	ABI15933	14.4 kDa salivary protein	Yes	PpSP15-like	20-21: CQA-ET	9.15	14.44	122	no
Kato et al. 2006	Dub	PduM39	DQ834331	ABI20147	35.8 kDa salivary protein	Yes	apyrase	21-22: SEG-AP	9	35.7609	315	apyrase	full
Kato et al. 2006	Dub	PduK35	DQ835364	ABI20169	D7 related protein	Yes	D7-related	19-20: GYS-WR	7.52	26.718	230	PBP-G0BP	3´truncated
Kato et al. 2006	Dub	PduK69	DQ835376	ABI20181	D7-like protein	Yes	D7-related	19-20: GYS-WQ	8.84	27.638	234	PBP-G0BP	3´truncated
Kato et al. 2006	Dub	PduK06	DQ835367	ABI20172	yellow related protein	Yes	yellow-related	18-19: ALS-DD	9.25	42.53	377	MRJP	full
Kato et al. 2006	Dub	PduK60	DQ835383	ABI20188	adenosine deaminase-like	Yes	ADA	17-18: VHA-SL
Kato et al. 2006	Dub	PduK04	DQ835365	ABI20170	yellow related protein	Yes	yellow-related	18-19: VFC-DD	7.74	43.36	381	MRJP	full
Kato et al. 2006	Dub	PduK107	DQ835386	ABI20191	antigen 5 related protein		Ag5-related	19-20: VQS-QN	9.22	28.907	252	SCP_euk	full
Kato et al. 2006	Dub	PduK103	DQ835385	ABI20190	D7 related protein		D7-related	19-20: GYS-WR	9.11	27.742	234	no
Kato et al. 2006	Dub	PduK78	DQ835381	ABI20186	D7 related protein		D7-related	22-23: GCS-WQ	8.66	27.47	234	no
Kato et al. 2006	Dub	PduK34	DQ835363	ABI20168	D7-like protein	Yes	D7-related	19-20: GYS-WK	8.52	26.381	229	PBP-G0BP	3´truncated
Kato et al. 2006	Dub	PduM82	DQ835360	ABI20165	endopeptidase inhibitor-like		endopeptidase inhibitor	20-21: SLA-LK
Kato et al. 2006	Dub	PduK109	DQ835387	ABI20192	14.2 kDa salivary protein.		PpSP15-like	20-21: CHA-TN	8.23	14.218	121	no
Kato et al. 2006	Dub	PduM73	DQ835357	ABI20162	adenosine deaminase-like	Yes	ADA	17-18: VHA-VL
Kato et al. 2006	Dub	PduM12	DQ826521	ABI15940	14 kDa salivaryu protein		PpSP15-like	21-22: SLA-AT	8.76	13.97	119	no
Kato et al. 2006	Dub	PduK40	DQ835366	ABI20171	14 kDa salivary protein	Yes	PpSP15-like	21-22: CQA-AN	8.81	13.974	120	no
Kato et al. 2006	Dub	PduK110	DQ835388	ABI20193	16.5 kDa salivary protein			19-20: VLG-QT
Kato et al. 2006	Dub	PduK84	DQ835384	ABI20189	27 kDa salivary protein		41.9 kDa	20-21: VSS-IF	4.28	27.473	247	no
Kato et al. 2006	Dub	PduM34	not in GenBank	not in GenBank				23–24
Kato et al. 2006	Dub	PduM51	not in GenBank	not in GenBank				20–21
Kato et al. 2006	Dub	PduM05	not in GenBank	not in GenBank		Yes		28–29
Kato et al. 2006	Dub	PduM64	not in GenBank	not in GenBank				20–21
Kato et al. 2006	Dub	PduK50	not in GenBank	not in GenBank		Yes	apyrase	21–22
Kato et al. 2006	Dub	PduK70	not in GenBank	not in GenBank		Yes		21–22
Kato et al. 2006	Dub	PduK74	not in GenBank	not in GenBank				21–22
Kato et al. 2006	Dub	PduK86	not in GenBank	not in GenBank				17–18
Kato et al. 2006	Dub	PduK05	not in GenBank	not in GenBank		Yes		18–19
	Lon	5NTD_LUTLO		Q9XZ43	5NUC		nucleotidase	25-26: AAA-ED
Valenzuela et al. 2004	Lon	LJL04	AY455906	AAS16906	29.2 kDa salivary protein		PpSP32-like	17-18: AQC-AN	10.18	29.246	278	no
Valenzuela et al. 2004	Lon	LJL08	M77090	AAA29288	maxadilan	Yes	maxadilan	23-24: AEG-CD
Valenzuela et al. 2004	Lon	LJL09	AY455911	AAS16911	71 kDa salivary protein		angiotensin converting enzyme	18-19: VSS-AV
Valenzuela et al. 2004	Lon	LJL11	AF132510	AAD32190	putative 5'-nucleotidase	Yes	nucleotidase	25-26: AAA-ED
Valenzuela et al. 2004	Lon	LJL124	AY455915	AAS16915	6 kDa salivary protein			20-21: AKA-RP
Valenzuela et al. 2004	Lon	LJL13	AF420274	AAL16051	D7 salivary protein	Yes	D7-related	19-20: GYS-WQ	4.82	26.551	228	no
Valenzuela et al. 2004	Lon	LJL138	AY455916	AAS16916	43.7 kDa salivary protein			20-21: IQG-AP
Valenzuela et al. 2004	Lon	LJL143	AY445936	AAS05319	32.4 kDa salivary protein		33 kDa	25-26: CDG-DE	8.21	32.324	276	Glyco_tranf_GTA_type	3´truncated
Valenzuela et al. 2004	Lon	LJL15	DQ190946	ABA39525	16.5 kDa salivary protein	Yes	anticoagulant	19-20: ITA-TD
Valenzuela et al. 2004	Lon	LJL17	AY452695	AAS17936	10 kDa salivary protein	Yes		20-21: AEA-KP
Valenzuela et al. 2004	Lon	LJL18	DQ190947	ABA39526	16.2 kDa salivary protein	Yes	anticoagulant	19-20: CNA-EE
Valenzuela et al. 2004	Lon	LJL23	AF131933	AAD33513	putative apyrase	Yes	apyrase	21-22: SQA-AP	9.11	35.0671	304	apyrase	full
Valenzuela et al. 2004	Lon	LJL34	AF132511	AAD32191	antigen 5-related protein		Ag5-related	19-20: VNA-QS	8.85	28.883	252	SCP_euk	full
Valenzuela et al. 2004	Lon	LJL35	AF132516	AAD32196	putative RGD-containing peptide		RGD	23-24: VKA-ME
Valenzuela et al. 2004	Lon	LJL38	AY438269	AAR99723	2.5 KDa salivary protein	Yes		20-21: IDG-AP
Valenzuela et al. 2004	Lon	LJL91	AY445934	AAS05317	16.3 kDa salivary protein	Yes	anticoagulant	19-20: ITA-AD
Valenzuela et al. 2004	Lon	LJM04	not in GenBank	not in GenBank		Yes	PpSP15-like	20-21
Valenzuela et al. 2004	Lon	LJM06	not in GenBank	not in GenBank		Yes	anticoagulant	19-20
Valenzuela et al. 2004	Lon	LJM10	DQ192486	ABB00902	16.7 kDa salivary protein	Yes	anticoagulant	19-20: STA-LQ
Valenzuela et al. 2004	Lon	LJM11	AY445935	AAS05318	43.2 kDa salivary protein	Yes	yellow-related	18-19: TLG-AD	9.32	43.25	381	MRJP	full
Valenzuela et al. 2004	Lon	LJM111	DQ192488	ABB00904	43 kDa salivary protein	Yes	yellow-related	18-19: IFG-VE	4.75	43	379	MRJP	full
Valenzuela et al. 2004	Lon	LJM114	AY455907	AAS16907	14.2 kDa salivary protein			24-25: SQA-FL
Valenzuela et al. 2004	Lon	LJM17	AF132518	AAD32198	putative yellow related-protein	Yes	yellow-related	18-19: IHG-AY	5.78	45.18	394	MRJP	full
Valenzuela et al. 2004	Lon	LJM19	AY438271	AAR99725	10.7 KDa salivary protein	Yes		22-23: VKC-SE
Valenzuela et al. 2004	Lon	LJM26	AY455913	AAS16913	49 kDa salivary protein		SERPIN	17-18: IWA-AE
Valenzuela et al. 2004	Lon	LJM78	AY455908	AAS16908	37.2 kDa salivary protein		41.9 kDa	20-21: ASA-LG	7.65	37.251	330	no
Valenzuela et al. 2004	Lon	LJS03	AY455914	AAS16914	15 kDa salivary protein			19-20: TFA-KP
Valenzuela et al. 2004	Lon	LJS105	AY455910	AAS16910	7.3 kDa salivary protein			19-20: VKA-RP
Valenzuela et al. 2004	Lon	LJS138	AY455917	AAS16917	16.1 kDa salivary protein			20-21: VLG-ET
Valenzuela et al. 2004	Lon	LJS142	DQ192487	ABB00903	16.6 kDa salivary protein	Yes	anticoagulant	20-21: CGA-DQ
Valenzuela et al. 2004	Lon	LJS169	AY455912	AAS16912	11.6 kDa salivary protein			22-23: VEG-SS
Valenzuela et al. 2004	Lon	LJS192	AY438270	AAR99724	9.6 KDa salivary protein			23-24: VVG-SC
Valenzuela et al. 2004	Lon	LJS193	AY455918	AAS16918	32.2 kDa salivary protein		hydrolase	20-21: SNG-AL
Valenzuela et al. 2004	Lon	LJS201	AY455919	AAS16919	9 kDa salivary protein	Yes		23-24: INA-ED
Valenzuela et al. 2004	Lon	LJS238	AY455909	AAS16909	4.6 kDa salivary protein			20-21: VAA-MP
Charlab et al. 1999	Lon	Lulo5NUC	AF132510	AAD32190	putative 5'-nucleotidase	Yes	nucleotidase	25-26: AAA-ED
Charlab et al. 1999	Lon	LuloAC	AF131932	AAD33512	anticoagulant		anticoagulant	19-20: STA-LQ
Charlab et al. 1999	Lon	LuloAG5	AF132511	AAD32191	antigen 5-related protein		Ag5-related	19-20: VNA-QS	8.85	28.883	252	SCP_euk	full
Charlab et al. 1999	Lon	LuloAMY	AF132512	AAD32192	putative alpha-amylase		amylase	18-19: VAA-QY
Charlab et al. 1999	Lon	LuloAPY	AF131933	AAD33513	putative apyrase	Yes	apyrase	21-22: SQA-AP	9.11	35.0671	304	apyrase	full
Charlab et al. 1999	Lon	LuloHYA	AF132515	AAD32195	putative hyaluronidase		hyaze	16-17: IFC-EE	7.98	42.285	360	Glyco_hydro_56	full
Charlab et al. 1999	Lon	LuloRGD	AF132516	AAD32196	putative RGD-containing peptide		RGD	23-24: VKA-ME
Charlab et al. 1999	Lon	LuloSL1	AF132517	AAD32197	SL1 protein		PpSP15-like	20-21: SLA-EH	8.59	13.928	119	no
Charlab et al. 1999	Lon	LuloYELLOW	AF132518	AAD32198	putative yellow related-protein	Yes	yellow-related	18-19: IHG-AY	5.78	45.18	394	MRJP	full
	Lon	MAXA_LUTLO		P30659	Maxadilan		nucleotidase	23-24: AEG-CD
	Lon		AY453401	AAS17937	16.4 kDa salivary protein		anticoagulant	19-20: CNA-ED
	Lon		AF234182	AAF78901	putative adenosine deaminase		ADA	18-19: CLA-WD
Valenzuela et al. 2001	Pap	PpSP30	AF335489	AAL11049	30 kDa salivary protein precursor	Yes	D7-related	19-20: GYS-WR	9.11	27.77	234	no
	Pap		DQ205724	ABA54266	29 kDa salivary protein	?	Ag5-related	19-20: VQS-QT	8.81	28.777	253	SCP_euk	full
Valenzuela et al. 2001	Pap	PpSP28	AF335488	AAL11048	28 kDa salivary protein precursor	Yes	D7-related	19-20: GYS-WK	8.28	27.214	235	PBP-G0BP	3´truncated
Valenzuela et al. 2001	Pap	PpSP36	AF261768	AAG17637	salivary apyrase	Yes	apyrase	21-22: SEG-AP	8.9	35.855	315	apyrase	full
Valenzuela et al. 2001	Pap	PpSP44	AF335492	AAL11052	44 kDa salivary protein precursor	Yes	yellow-related	18-19: VFC-DD	8.7	43.64	382	MRJP	full
Valenzuela et al. 2001	Pap	PpSP42	AF335491	AAL11051	42 kDa salivary protein precursor	Yes	yellow-related	19-20: ALS-DD	9	42.37	376	MRJP	full
Valenzuela et al. 2001	Pap	PpSP32	AF335490	AAL11050	32 kDa salivary protein precursor	Yes	PpSP32-like	23-24: SSS-AS	9.26	24.441	223	no
Valenzuela et al. 2001	Pap	PpSP15	AF335487	AAL11047	15 kDa salivary protein precursor	Yes	PpSP15-like	20-21: CQA-EN	9.31	14.47	122	no
Valenzuela et al. 2001	Pap	PpSP14	AF335486	AAL11046	14 kDa salivary protein precursor	Yes	PpSP15-like	20-21: AFG-FE	8.61	14.731	122	no
Valenzuela et al. 2001	Pap	PpSP12	AF335485	AAL11045	12 kDa salivary protein precursor	Yes	PpSP15-like	20-21: CQA-LN	9.4	13.779	120	no
Valenzuela et al. 2001	Pap	PpSP64	AF335490	AAL11050	32 kDa salivary protein precursor	Yes	PpSP32-like	23-24: SSS-AS	9.26	24.441	223	no
Valenzuela et al. 2001	Pap	PpSP46	AF335491	AAL11051	42 kDa salivary protein precursor	Yes	yellow-related	19-20: ALS-DD	9	42.37	376	MRJP	full
Valenzuela et al. 2001	Pap	PpSP52	not in GenBank	not in GenBank		Yes
Anderson et al. 2006	Per	PpeSP01B	DQ192491	ABB00907	35.3 kDa salivary protein	Yes	apyrase	21-22: AEA-AP	9.04	35.282	311	apyrase	full
Anderson et al. 2006	Per	PpeSP04B	DQ150624	ABA43052	27 kDa D7-related salivary protein SP04B	Yes	D7-related	19-20: GYS-WQ	8.71	26.927	233	no
Anderson et al. 2006	Per	PpeSP03	DQ150621	ABA43049	42 kDa yellow-related salivary protein SP03	Yes	yellow-related	18-19: VLA-YD	6.01	41.81	370	MRJP	full
Anderson et al. 2006	Per	PpeSP13	DQ153107	ABA43061	10 kDa salivary protein SP13			20-21: AKA-IE	4.77	9.745	77	no
Anderson et al. 2006	Per	PpeSP12	DQ153106	ABA43060	7 kDa salivary protein SP12			20-21: AKA-IE	10.97	7.065	62	no
Anderson et al. 2006	Per	PpeSP11	DQ153105	ABA43059	13 kDa salivary protein SP11	Yes	PpSP15-like	19-20: CHA-EP	8.95	13.206	112	PBP_GOBP	5´truncated
Anderson et al. 2006	Per	PpeSP09	DQ153103	ABA43057	14.6 kDa salivary protein SP09	Yes	PpSP15-like	20-21: CQG-DH	8.58	14.573	121	no
Anderson et al. 2006	Per	PpeSP08	DQ153102	ABA43056	29 kDa salivary protein SP08		30 kDa antigen/Aegyptin	25-26: VDG-YH	4.9	26.836	232	no
Anderson et al. 2006	Per	PpeSP07	DQ153101	ABA43055	30 kDa antigen 5-related salivary protein SP07	Yes	Ag5-related	19-20: VHA-ND	9.09	28.825	252	SCP_euk	full
Anderson et al. 2006	Per	PpeSP04	DQ150623	ABA43051	24.5 kDa D7-related salivary protein SP04	Yes	D7-related	19-20: GYS-WQ	7.97	27.014	234	PBP-G0BP	full
Anderson et al. 2006	Per	PpeSP03B	DQ150622	ABA43050	43 kDa yellow-related salivary protein SP03B	Yes	yellow-related	18-19: VVG-FH	8.64	42.68	375	MRJP	full
Anderson et al. 2006	Per	PpeSP01	DQ192490	ABB00906	35.5 kDa salivary protein	Yes	apyrase	20-21: GEA-AP	9.26	35.6328	312	apyrase	full
Anderson et al. 2006	Per	PpeSP02	DQ150620	ABA43048	14.8 kDa salivary protein SP02	Yes	PpSP15-like	20-21: CRS-EK	8.74	14.798	121	no
Anderson et al. 2006	Per	PpeSP06	DQ153100	ABA43054	33 kDa salivary protein SP06	Yes	33 kDa	22-23: IIC-IK	9.07	33.789	288	no
Anderson et al. 2006	Per	PpeSP15	DQ192489	ABB00905	2.7 kDa salivary protein			21-22: CSP-QL	10.2	3.097	28	no
Anderson et al. 2006	Per	PpeSP32	DQ154099	ABA43064	41 kDa salivary protein SP32		endonuclease	23-24: SKS-AP
Anderson et al. 2006	Per	PpeSP19	DQ154098	ABA43063	46 kDa salivary protein SP19	Yes	41.9 kDa	20-21: VSS-IF	8.48	45.814	411	COG1511	3´truncated
Anderson et al. 2006	Per	PpeSP18	DQ154097	ABA43062	30 kDa salivary protein SP18		phospholipase A2	29-30: ARA-KP
Anderson et al. 2006	Per	PpeSP10	DQ153104	ABA43058	27 kDa D7-related salivary protein SP10	Yes	D7-related	19-20: ANS-LR	9.44	26.709	230	PBP-G0BP	3´truncated
Anderson et al. 2006	Per	PpeSP05	DQ153099	ABA43053	28 kDa salivary protein SP05		PpSP32-like	17-18: AQC-AL	10.39	27.774	256	no
Rohousova et al. 201x	Ser	PsSP10	HM560869	ADJ54118	14.02 kDa salivary PpSP15-like protein	Yes	PpSP15-like	20-21: CRA-GN	8.92	14.018	120	no
Rohousova et al. 201x	Ser	PsSP11	HM560871	ADJ54120	13.95 kDa salivary PpSP15-like protein	Yes	PpSP15-like	20-21: CRA-GN	8.05	13.948	120	no
Rohousova et al. 201x	Ser	PsSP14	HM560870	ADJ54119	17.06 kDa salivary PpSP15-like protein		PpSP15-like	20-21: CQA-ET	8.76	17.06	142	no
Rohousova et al. 201x	Ser	PsSP15	HM560868	ADJ54117	14.66 kDa salivary PpSP15-like protein	Yes	PpSP15-like	20-21: CQA-ET	9.07	14.661	122	no
Rohousova et al. 201x	Ser	PsSP18	HM569361	ADJ54122	42.2 kDa salivary yellow-related protein	Yes	yellow-related	18-19: VLS-DD	9.02	42.2002	377	MRJP	full
Rohousova et al. 201x	Ser	PsSP19	HM560865	ADJ54114	42.5 kDa salivary yellow-related protein	Yes	yellow-related	18-19: VLS-DD	8.86	42.4925	377	MRJP	full
Rohousova et al. 201x	Ser	PsSP20	HM560866	ADJ54115	42.4 kDa salivary yellow-related protein	Yes	yellow-related	18-19: VLS-DD	9.8	42.3895	377	MRJP	full
Rohousova et al. 201x	Ser	PsSP22	HM560867	ADJ54116	42.3 kDa salivary yellow-related protein	Yes	yellow-related	18-19: VLS-DD	5.7	42.2608	377	MRJP	full
Rohousova et al. 201x	Ser	PsSP26	HM569362	ADJ54123	43.9 kDa salivary yellow-related protein	Yes	yellow-related	18-19: VFC-DD	8.06	43.8508	382	MRJP	full
Rohousova et al. 201x	Ser	PsSP28	HM569370	ADJ54131	3.0 kDa salivary protein			20-21: MMS-SQ	10.68	3.016	27	no
Rohousova et al. 201x	Ser	PsSP4	HM560863	ADJ54112	26.78 kDa salivary D7-related protein	Yes	D7-related	19-20: GYA-WQ	8.93	26.775	233	no
Rohousova et al. 201x	Ser	PsSP40	HM560860	ADJ54109	35.6 kDa salivary apyrase	Yes	apyrase	21-22: SEG-AP	8.87	35.5775	315	apyrase	full
Rohousova et al. 201x	Ser	PsSP41	HM560862	ADJ54111	33.7 kDa salivary apyrase	Yes	apyrase	21-22: SEG-AP	8.31	33.6784	295	apyrase	full
Rohousova et al. 201x	Ser	PsSP42	HM560861	ADJ54110	35.9 kDa salivary apyrase	Yes	apyrase	21-22: SEG-AP	8.91	35.8579	317	apyrase	full
Rohousova et al. 201x	Ser	PsSP44	HM569368	ADJ54129	22.5 kDa salivary protein		PpSP32-like	23-24: SSS-AK	9.27	22.459	204	no
Rohousova et al. 201x	Ser	PsSP49	HM569369	ADJ54130	32.9 kDa salivary protein	Yes	33 kDa	21-22: GLG-VE	9	32.937	279	no
Rohousova et al. 201x	Ser	PsSP5	HM569360	ADJ54121	26.76 kDa salivary D7-related protein	Yes	D7-related	19-20: GYS-WQ	8.93	26.76	233	no
Rohousova et al. 201x	Ser	PsSP52	HM537134	ADJ54108	29.0 kDa salivary antigen 5-related protein	Yes	Ag5-related	24-25: VPS-QN	8.75	29.024	254	SCP_euk	full
Rohousova et al. 201x	Ser	PsSP54	HM569365	ADJ54126	14.62 kDa salivary PpSP15-like protein		PpSP15-like	19-20: VSG-SH	8.61	14.619	121	no
Rohousova et al. 201x	Ser	PsSP55	HM569363	ADJ54124	14.57 kDa salivary PpSP15-like protein		PpSP15-like	19-20: VSG-SH	8.61	14.574	121	no
Rohousova et al. 201x	Ser	PsSP7	HM560864	ADJ54113	26.70 kDa salivary D7-related protein	Yes	D7-related	19-20: GYS-LQ	8.41	26.704	233	no
Rohousova et al. 201x	Ser	PsSP73	HM569367	ADJ54128	12.2 kDa salivary protein			21-22: AFA-DS	4.51	12.236	118	no
Rohousova et al. 201x	Ser	PsSP82	HM569371	ADJ54132	56.6 kDa salivary protein		41.9 kDa	20-21: VSS-VF	4.74	56.646	508	no
Rohousova et al. 201x	Ser	PsSP9	HM569364	ADJ54125	14.05 kDa salivary PpSP15-like protein	Yes	PpSP15-like	22-23: CRA-GN	9.06	14.046	120	no
Rohousova et al. 201x	Ser	PsSP98	HM569366	ADJ54127	14.3 kDa salivary protein			24-25: ATA-KP	4.73	14.298	127	no
Rohousova et al. 201x	Tob	PtSP10	HM135952	ADJ54078	35.7 kDa salivary apyrase	Yes	apyrase	20-21: GEA-AP	9.05	35.6799	311	apyrase	full
Rohousova et al. 201x	Tob	PtSP17	HM164140	ADJ54085	14.7 kDa salivary PpSP15-like protein		PpSP15-like	20-21: CHA-ER	7.98	14.745	123	no
Rohousova et al. 201x	Tob	PtSP18	HM164141	ADJ54086	13.8 kDa salivary PpSP15-like protein		PpSP15-like	19-20: CHA-ER	8.62	13.837	118	no
Rohousova et al. 201x	Tob	PtSP23	HM164142	ADJ54087	13.2 kDa salivary PpSP15-like protein	Yes	PpSP15-like	19-20: CHA-EQ	9.08	13.243	112	PBP_GOBP	5´truncated
Rohousova et al. 201x	Tob	PtSP27	HM173642	ADJ54101	24.3 kDa salivary protein	Yes	PpSP32-like	18-19: AQC-AP	10.08	24.341	225	no
Rohousova et al. 201x	Tob	PtSP28	HM173643	ADJ54102	24.53 kDa salivary protein	Yes	PpSP32-like	18-19: AQC-AP	10.04	24.527	227	no
Rohousova et al. 201x	Tob	PtSP29	HM173644	ADJ54103	24.5 kDa salivary protein	Yes	PpSP32-like	18-19: AQC-AP	10.1	24.5	227	no
Rohousova et al. 201x	Tob	PtSP31	HM164143	ADJ54088	14.4 kDa salivary PpSP15-like protein		PpSP15-like	20-21: CQG-DH	8.73	14.389	119	no
Rohousova et al. 201x	Tob	PtSP32	HM164144	ADJ54089	14.6 kDa salivary PpSP15-like protein	Yes	PpSP15-like	20-21: CQG-DH	8.71	14.597	121	no
Rohousova et al. 201x	Tob	PtSP37	HM140618	ADJ54079	41.5 kDa salivary yellow-related protein	Yes	yellow-related	18-19: VLA-YH	5.96	41.4888	370	MRJP	full
Rohousova et al. 201x	Tob	PtSP38	HM140619	ADJ54080	42.6 kDa salivary yellow-related protein	Yes	yellow-related	18-19: VVG-FH	8.47	42.5823	375	MRJP	full
Rohousova et al. 201x	Tob	PtSP4	HM135951	ADJ54077	35.2 kDa salivary apyrase	Yes	apyrase	21-22: AEA-AP	9.14	35.224	311	apyrase	full
Rohousova et al. 201x	Tob	PtSP42	HM164145	ADJ54090	25.3 kDa salivary D7-related protein		D7-related	19-20: ANS-LQ	9.5	25.298	216	no
Rohousova et al. 201x	Tob	PtSP44	HM164146	ADJ54091	26.8 kDa salivary D7-related protein	Yes	D7-related	19-20: ANS-LQ	9.43	26.766	230	no
Rohousova et al. 201x	Tob	PtSP49	HM173648	ADJ54107	45.5 kDa salivary protein		41.9 kDa	20-21: VSS-IF	8.33	45.501	410	no
Rohousova et al. 201x	Tob	PtSP54	HM164151	ADJ54096	27.0 kDa salivary D7-related protein	Yes	D7-related	19-20: GYS-WQ	8.4	26.906	234	PBP-G0BP	full
Rohousova et al. 201x	Tob	PtSP56	HM164147	ADJ54092	25.9 kDa salivary D7-related protein	Yes	D7-related	19-20: GYS-WQ	8.14	27.222	236	PBP-G0BP	full
Rohousova et al. 201x	Tob	PtSP57	HM164148	ADJ54093	26.7 kDa salivary D7-related protein	Yes	D7-related	19-20: GFS-WK	8.88	26.744	233	PBP-G0BP	3´truncated
Rohousova et al. 201x	Tob	PtSP58	HM164149	ADJ54094	26.96 kDa salivary D7-related protein	Yes	D7-related	19-20: GFS-WK	8.26	26.957	233	no
Rohousova et al. 201x	Tob	PtSP60	HM164150	ADJ54095	27.1 kDa salivary D7-related protein	Yes	D7-related	19-20: GFS-WK	8.12	27.065	233	PBP-G0BP	3´truncated
Rohousova et al. 201x	Tob	PtSP66	HM173645	ADJ54104	33.9 kDa salivary protein	Yes	33 kDa	22-23: TIC-IK	9	33.931	288	no
Rohousova et al. 201x	Tob	PtSP71	HM173638	ADJ54097	4.5 kDa salivary protein			20-21: AEA-IP	10.57	4.546	42	no
Rohousova et al. 201x	Tob	PtSP73	HM173639	ADJ54098	38.8 kDa salivary protein	Yes	30 kDa antigen/Aegyptin	21-22: TEQ-AP	4.41	38.8	336	no
Rohousova et al. 201x	Tob	PtSP75	HM173640	ADJ54099	27.8 kDa salivary protein		30 kDa antigen/Aegyptin	21-22: TEQ-DR	4.56	27.758	243	no
Rohousova et al. 201x	Tob	PtSP76	HM173641	ADJ54100	28.0 kDa salivary protein		30 kDa antigen/Aegyptin	21-22: TEQ-DR	4.49	27.982	244	NicO	3´5´truncated
Rohousova et al. 201x	Tob	PtSP77	HM140620	ADJ54081	31.2 kDa salivary antigen 5-related protein	Yes	Ag5-related	27-28: VHA-ND	9.09	31.213	272	SCP_euk	full
Rohousova et al. 201x	Tob	PtSP78	HM140621	ADJ54082	30.2 kDa salivary antigen 5-related protein		Ag5-related	27-28: VHA-ND	9.18	30.233	263	SCP_euk	full
Rohousova et al. 201x	Tob	PtSP79	HM140622	ADJ54083	28.8 kDa salivary antigen 5-related protein	Yes	Ag5-related	28-29: VHA-ND	9.15	28.819	252	SCP_euk	full
Rohousova et al. 201x	Tob	PtSP8	HM173646	ADJ54105	5.0 kDa salivary protein	Yes		23-24: TLS-DS	10.2	4.989	43	no
Rohousova et al. 201x	Tob	PtSP81	HM173647	ADJ54106	3.7 kDa salivary protein			21-22: CSP-QL	9.47	3.736	34	no
Rohousova et al. 201x	Tob	PtSP9	HM164139	ADJ54084	14.9 kDa salivary PpSP15-like protein	Yes	PpSP15-like	20-21: CRS-EK	8.6	14.861	122	no
